# Supplementary material
Source: publisher figshare collection journal article supplement (https://frontiersin.figshare.com/ndownloader/files/25724063)
Supplement: Supplementary file [file 25724063]

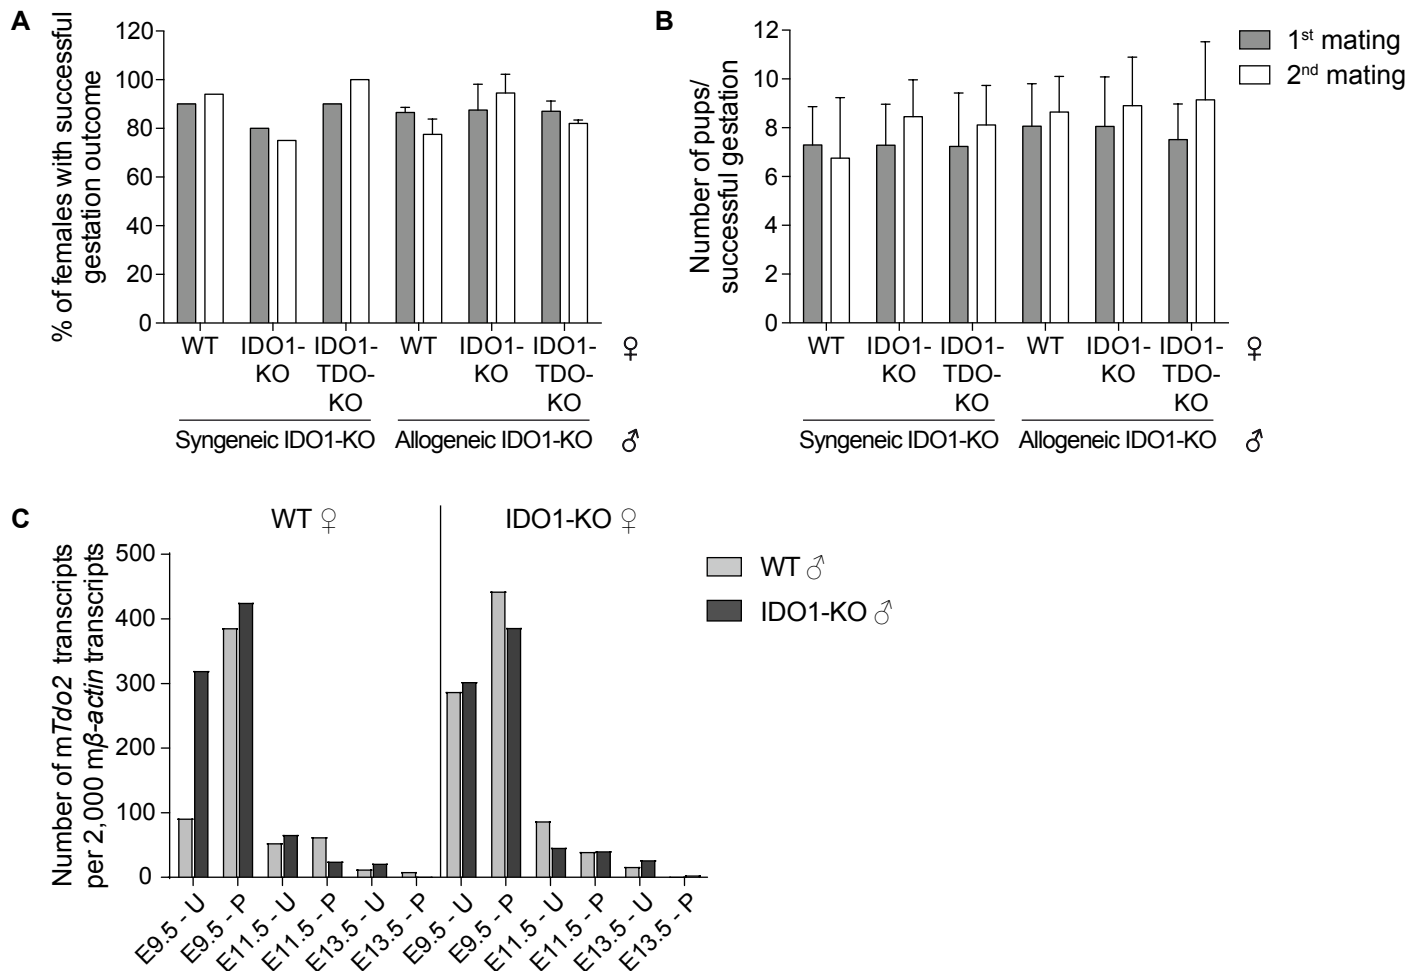

### Supplementary figure 2. Outcome of gestation in IDO1-KO and double IDO1-TDO-KO females.

WT littermate, IDO1-KO littermate or IDO1-TDO-KO B/6 females were mated with either syngeneic IDO1-KO B/6 males or allogeneic IDO1-KO BALB/c males (20 females/group). The number of females giving birth and the number of pups per successful gestation were counted (grey bars). The females that gave birth were mated a second time with the same males (white bars).

**(A)** Percentage of females giving birth (mean  $\pm$  SD of 1 (syngeneic) or 2 (allogeneic) independent experiments).

**(B)** Numbers of pups per successful gestation (mean  $\pm$  SD of pups pooled from 1 (syngeneic) or 2 (allogeneic) independent experiments).

**(C)** WT and IDO1-KO B/6 females were mated with syngeneic WT or IDO1-KO B/6 males and RNA was extracted separately from placenta and uteri between days E9.5 and E13.5 of gestation (the same samples as in Figure 5A). *Tdo2* expression was measured by RT-qPCR and reported to 2,000 copies of murine  $\beta$ -actin (mean  $\pm$  SD).
